# Supplementary material for: Effects of testosterone treatment on body fat and lean mass in obese men on a hypocaloric diet: a randomised controlled trial
Source: Springer Nature journal article supplement (doi:10.1186/s12916-016-0700-9), 2016-10-05

**Table S1: Change in main outcomes compared to baseline within and between groups analysed by ITT**

|                                  | Testosterone group<br>N=49 | Placebo group<br>N=51    | Difference between<br>groups <sup>^</sup> | p-value <sup>#</sup> |
|----------------------------------|----------------------------|--------------------------|-------------------------------------------|----------------------|
| <b>Fat mass (kg)</b>             |                            |                          |                                           |                      |
| week 0-10                        | -7.7 (-9.5, -5.9)*         | -7.2 (-9.0, -5.4)*       | -0.5 (-3.1, 2.1)                          | 0.71                 |
| week 0-56                        | -8.3 (-10.1, -6.4)*        | -5.0 (-6.9, -3.2)*       | -3.3 (-5.8, -0.7)                         | 0.014                |
|                                  |                            |                          |                                           |                      |
| <b>Fat mass (%)</b>              |                            |                          |                                           |                      |
| week 0-10                        | -3.7 (-4.8, -2.5)*         | -3.0 (-4.1, -1.8)*       | -0.7 (-2.4, 0.9)                          | 0.39                 |
| week 0-56                        | -5.0 (-6.1, -3.8)*         | -2.4 (-3.5, -1.2)*       | -2.6 (-4.3, -1.0)                         | 0.002                |
|                                  |                            |                          |                                           |                      |
| <b>Lean mass (kg)</b>            |                            |                          |                                           |                      |
| week 0-10                        | -3.9 (-5.2, -2.5)*         | -4.6 (-5.9, -3.3)*       | 0.7 (-1.1, 2.6)                           | 0.44                 |
| week 0-56                        | -0.7 (-2.0, 0.7)           | -3.0 (-4.3, -1.6)*       | 2.3 (0.5, 4.2)                            | 0.015                |
|                                  |                            |                          |                                           |                      |
| <b>VAT area (mm<sup>2</sup>)</b> |                            |                          |                                           |                      |
| week 0-10                        | -7,581 (-9,209, -5,934)*   | -6,247 (-7,892, -4,602)* | -1,334 (-3,648, 980)                      | 0.26                 |
| week 0-56                        | -6,572 (-8,200, -4,944)*   | -3,349 (-4,994, -1,705)* | -3,223 (-5,537, -909)                     | 0.007                |
|                                  |                            |                          |                                           |                      |
| <b>Body weight (kg)</b>          |                            |                          |                                           |                      |
| week 0-10                        | -11.7 (-14.2, -9.2)*       | -12.9 (-15.4, -10.4)*    | 1.2 (-2.4, 4.7)                           | 0.51                 |
| week 0-56                        | -10.4 (-12.9, -7.9)*       | -8.2 (-10.7, -5.7)*      | -2.2 (-5.7, 1.4)                          | 0.23                 |

Data are mean (95% CI)

<sup>^</sup>Difference between groups (mean adjusted difference) refers to the change over time across groups (linear mixed effects model)

<sup>#</sup>the p-value refers to the overall significance of the change between groups during follow-up

\* p < 0.05 within group

**Figure S1. Circulating testosterone and luteinising hormone levels in placebo and testosterone treated men.**

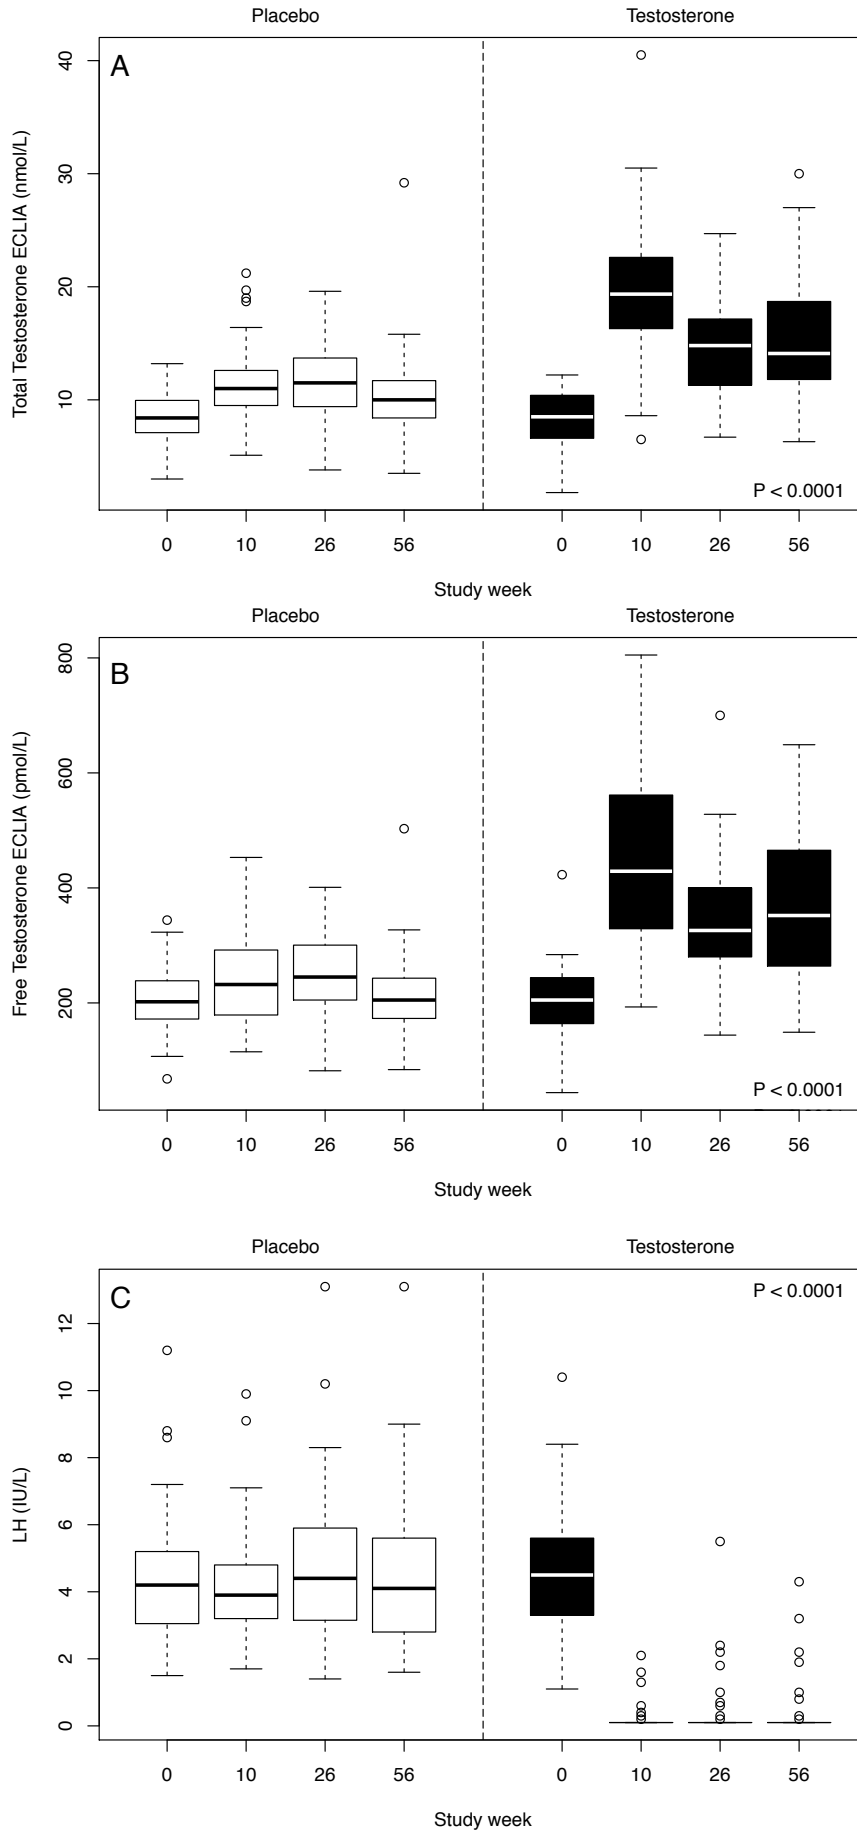

**Figure S2. Body weights in placebo and testosterone treated men.**

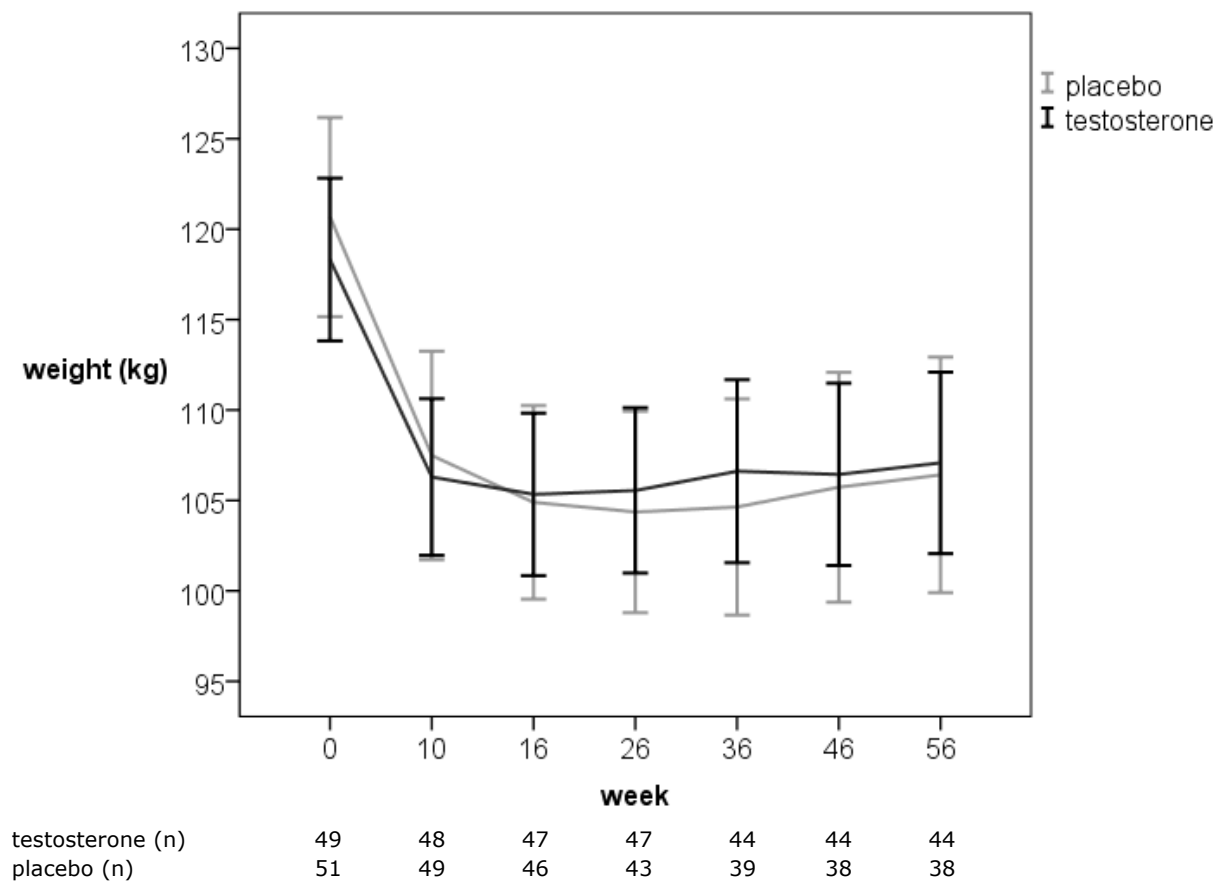

Supplement: MOESM1 [file 10832036]
